# Supplementary material
Source: Royal Society of Chemistry journal article supplement (doi:10.1039/d6ay00592f)
Supplement: d6ay00592f1.pdf [file d6ay00592f1.pdf]

## Supporting Information

# Single-precursor-derived carbon and nitrogen co-doped CuO nanozymes for colorimetric detection of tetracycline

Yu Liu,<sup>a</sup> Jingjing Fang,<sup>a</sup> Liangxiao Jiang,<sup>a</sup> Hengchao Yang,<sup>a</sup> Cheng Yao<sup>\*a</sup> and Chan Song<sup>\*a</sup>

<sup>a</sup> *School of Chemistry and Molecular Engineering, Nanjing Tech University, Nanjing 211816, China.*

*Email: yaocheng@njtech.edu.cn; songchan@njtech.edu.cn*

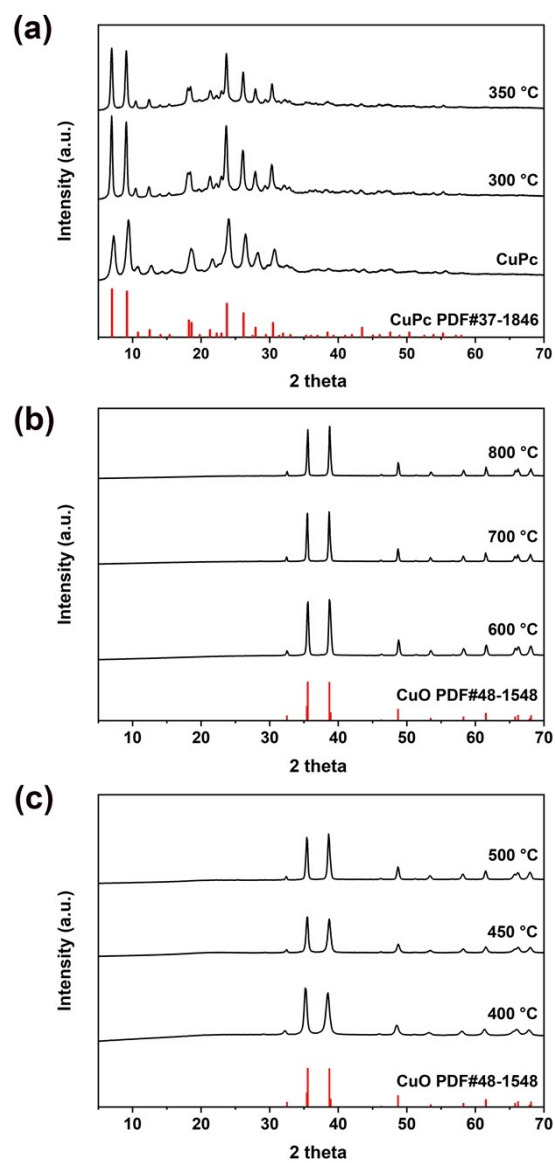

**Figure S1.** XRD patterns of CuPc and materials obtained by pyrolyzing CuPc(II) at the reaction temperatures ranged from 300 °C to 800 °C.

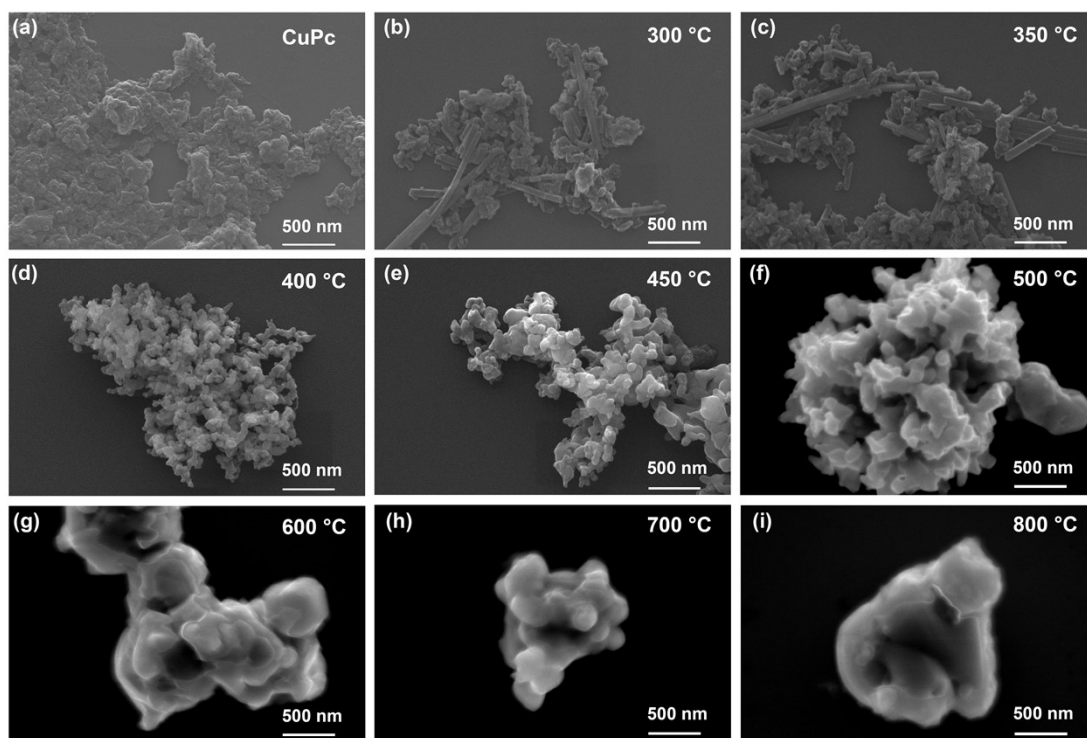

**Figure S2.** SEM images of CuPc and materials obtained by pyrolyzing CuPc(II) at the reaction temperatures ranged from 300 °C to 800 °C.

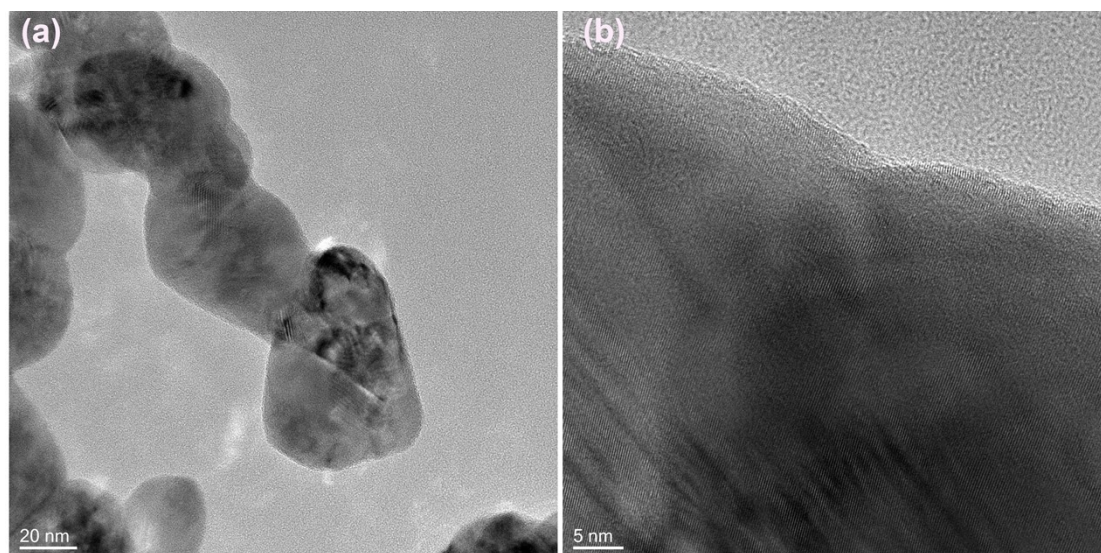

**Figure S3.** Typical TEM image (a) and HRTEM image (b) of C-N/CuO-400.

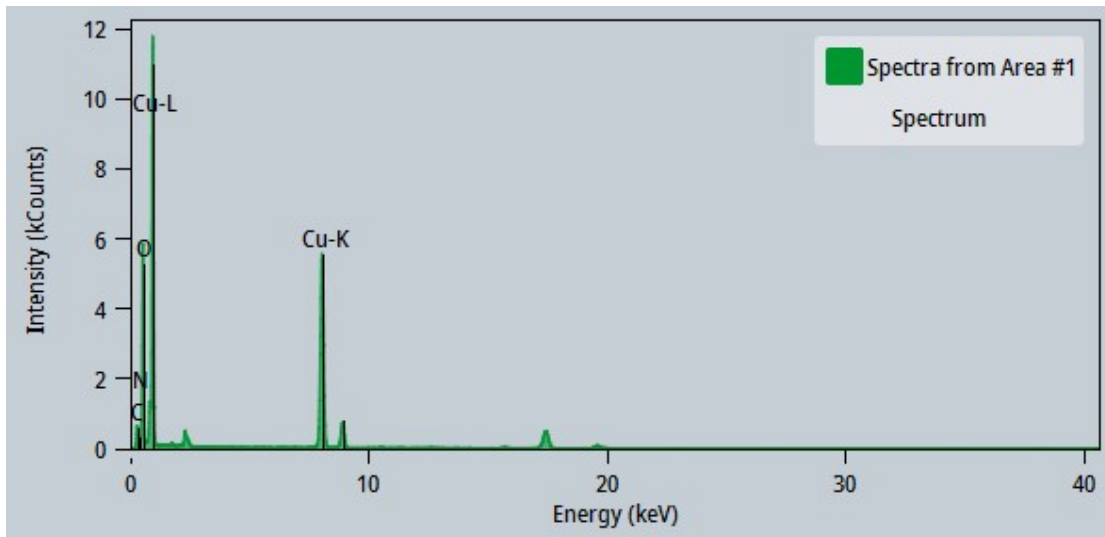

**Figure S4.** EDX spectrum of C-N/CuO-400.

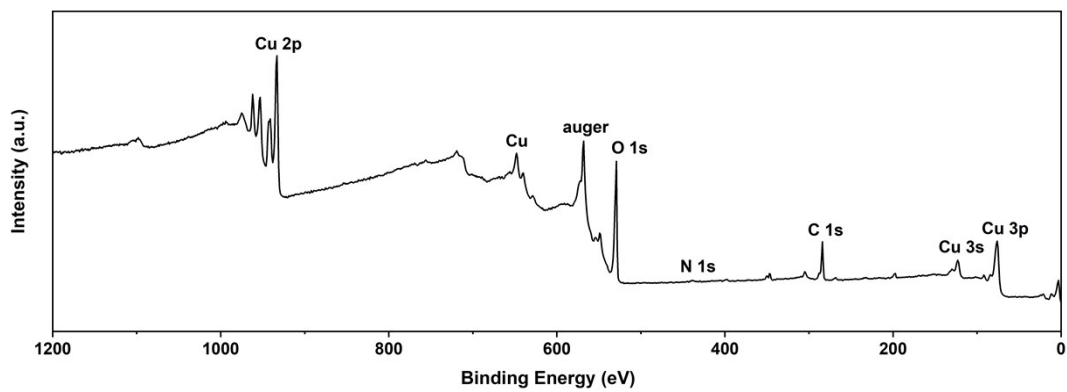

**Figure S5.** XPS spectrum of C-N/CuO-400.

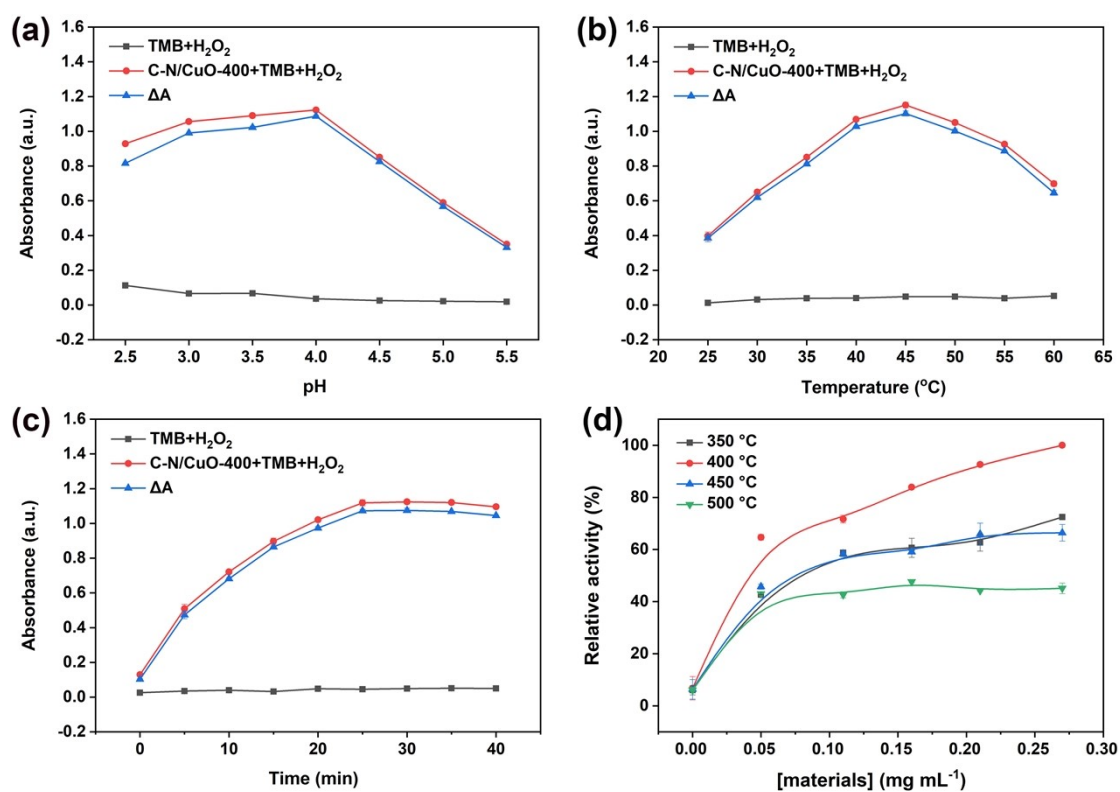

**Figure S6.** The absorbance intensity at 652 nm of TMB and H<sub>2</sub>O<sub>2</sub> with and without C-N/CuO-400 at different pH (a), temperature (b), and incubation time (c).  $\Delta A = A - A_0$ , A and A<sub>0</sub> was the absorbance intensity of TMB and H<sub>2</sub>O<sub>2</sub> with and without C-N/CuO-400, respectively. (d) The absorbance intensity at 652 nm of TMB and H<sub>2</sub>O<sub>2</sub> with different amounts of materials calcined at different temperatures.

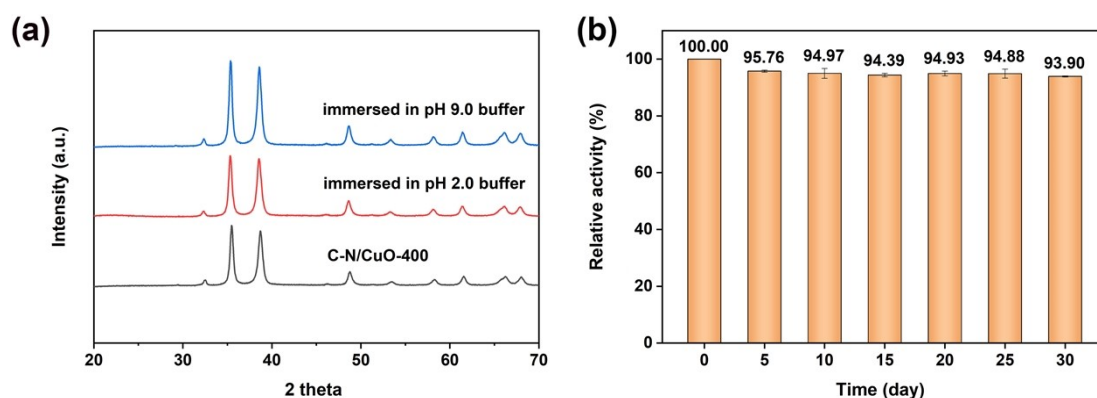

**Figure S7.** (a) XRD patterns of C-N/CuO-400 and C-N/CuO-400 immersed in different pH buffer for 30 minutes. (b) Stability of the catalytic property provided by C-N/CuO-400.

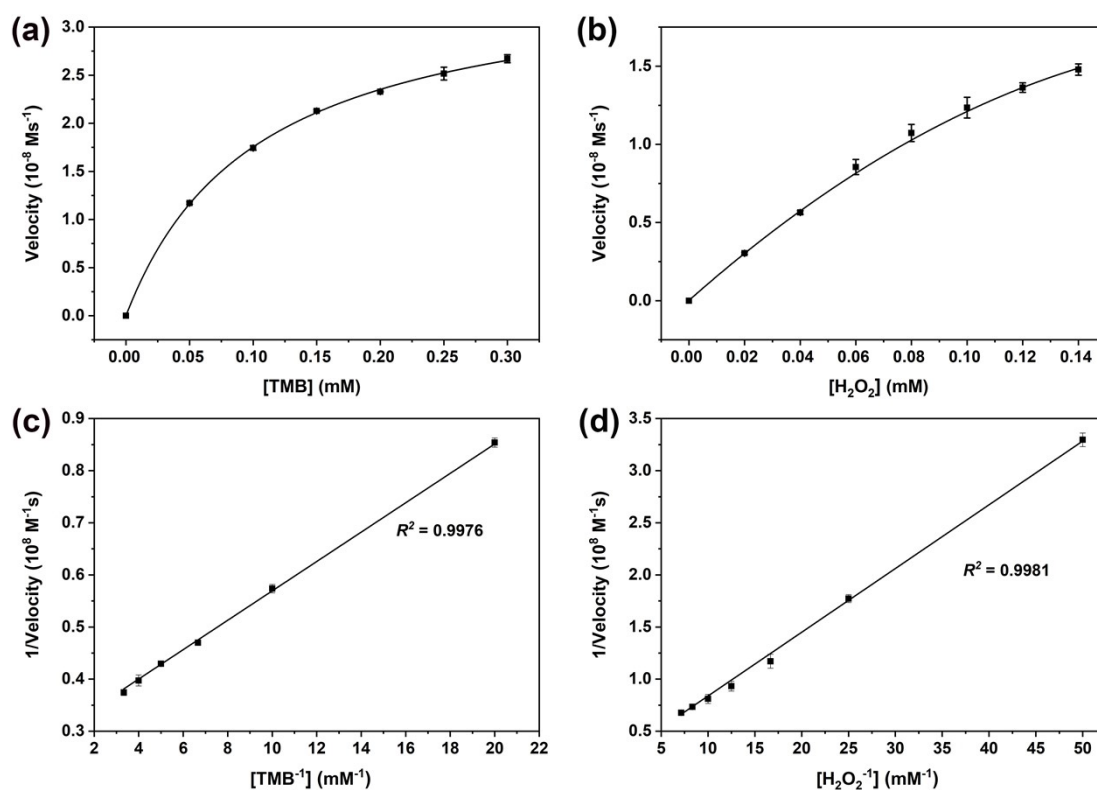

**Figure S8.** Steady-state kinetic analyses of C-N/CuO-400 using the Michaelis-Menten model (a and b) and the Lineweaver-Burk double inverse model (c and d).

**Table S1.** The kinetic parameters of oxidation reaction catalyzed by horseradish peroxidase (HRP) and some enzyme-like nanomaterials.

| Catalysts                  | TMB           |                                                    | H <sub>2</sub> O <sub>2</sub> |                                                    | Reference        |
|----------------------------|---------------|----------------------------------------------------|-------------------------------|----------------------------------------------------|------------------|
|                            | $K_m$<br>(mM) | $V_{max}$<br>(10 <sup>-8</sup> M s <sup>-1</sup> ) | $K_m$<br>(mM)                 | $V_{max}$<br>(10 <sup>-8</sup> M s <sup>-1</sup> ) |                  |
| HRP                        | 0.43          | 10.00                                              | 3.70                          | 8.71                                               | [1]              |
| CuO/Pt NFs                 | 0.33          | 27.86                                              | 0.75                          | 12.88                                              | [2]              |
| Cu-Cu <sub>2</sub> O/PtPd  | 0.34          | 12.78                                              | 0.28                          | 2.41                                               | [3]              |
| PAN-CuO                    | 0.09          | 4.68                                               | 0.58                          | 20.14                                              | [4]              |
| CuO <sub>x</sub>           | 0.46          | 14.56                                              | 1.84                          | 9.57                                               | [5]              |
| Cu <sub>2</sub> O/Pt cubes | 0.29          | 2.72                                               | 5.82                          | 2.46                                               | [6]              |
| <b>C-N/CuO-400</b>         | <b>0.098</b>  | <b>3.48</b>                                        | <b>0.27</b>                   | <b>4.42</b>                                        | <b>This work</b> |

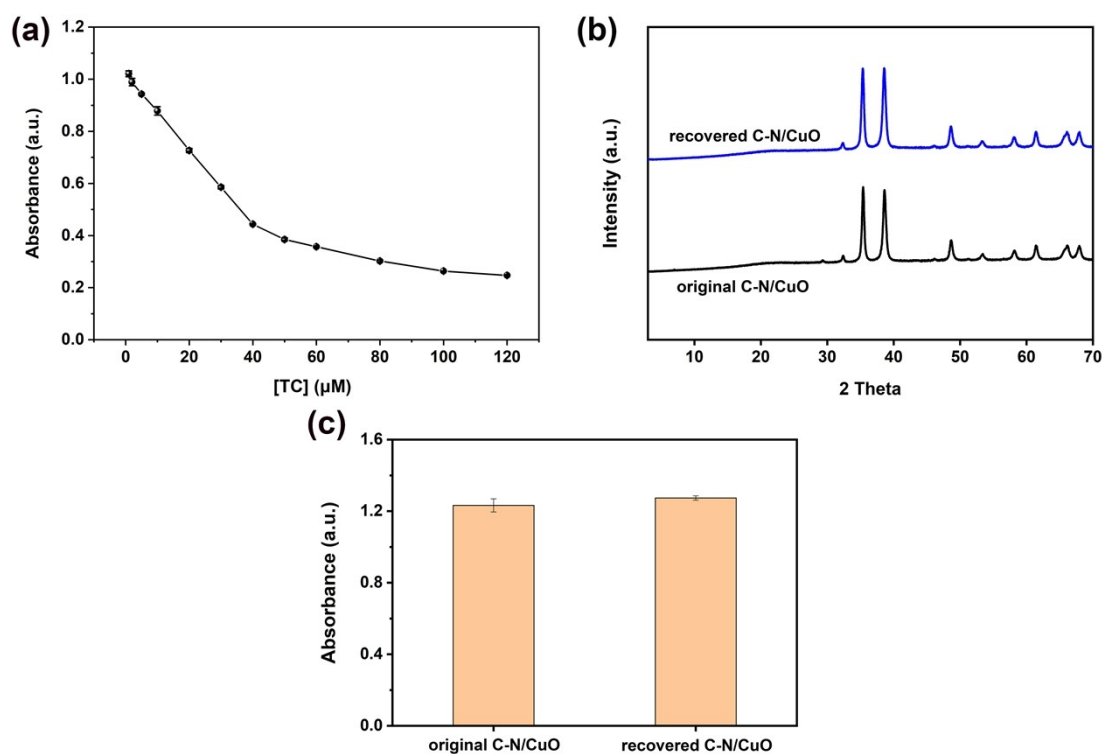

**Figure S9.** (a) The absorption intensity at 652 nm of C-N/CuO-400-based catalytic system with different concentration of TC. XRD patterns (b) and catalytic activity tests (c) of the original and recovered C-N/CuO-400 after the TC detection process.

**Table S2.** Linear ranges and detection limits of different nanomaterial-based methods for TC detection.

| Materials          | Methods            | Detection limit ( $\mu\text{M}$ ) | Linear range ( $\mu\text{M}$ ) | Reference        |
|--------------------|--------------------|-----------------------------------|--------------------------------|------------------|
| D-Trp-OMe@AuNCs    | Colorimetry        | 0.20                              | 1.5-30.0                       | [7]              |
| PEI-SQDs           | Fluorometric       | 0.15                              | 0.20-100.0                     | [8]              |
| LLCDs              | Fluorometric       | 0.42                              | 0-27.27                        | [9]              |
| N-CQDs             | Fluorometric       | 0.34                              | 0-100.0                        | [10]             |
| MIP-AA/CQDs        | Fluorometric       | 0.17                              | 1.0-60.0                       | [11]             |
| <b>C-N/CuO-400</b> | <b>Colorimetry</b> | <b>0.15</b>                       | <b>1.0-40.0</b>                | <b>This work</b> |

**Table S3.** Recovery of spiked TC from actual samples.

| Samples             | Spiked ( $\mu\text{M}$ ) | Recovered ( $\mu\text{M}$ ) | Recovery (%) | RSD (%) |        |      |
|---------------------|--------------------------|-----------------------------|--------------|---------|--------|------|
| Lake water          | 20                       | 20.36                       | 20.22        | 20.36   | 101.56 | 0.40 |
|                     | 30                       | 29.70                       | 29.84        | 30.11   | 99.61  | 0.71 |
|                     | 40                       | 38.76                       | 39.38        | 40.29   | 98.69  | 1.95 |
| Yangtze River water | 20                       | 19.80                       | 19.03        | 19.52   | 97.26  | 1.99 |
|                     | 30                       | 31.02                       | 29.98        | 30.25   | 101.39 | 1.78 |
|                     | 40                       | 39.52                       | 40.15        | 40.08   | 99.79  | 0.86 |
| Honey               | 20                       | 19.03                       | 20.29        | 20.57   | 99.82  | 4.09 |
|                     | 30                       | 29.42                       | 30.67        | 30.81   | 101.00 | 2.53 |
|                     | 40                       | 38.97                       | 40.08        | 39.87   | 99.10  | 1.50 |

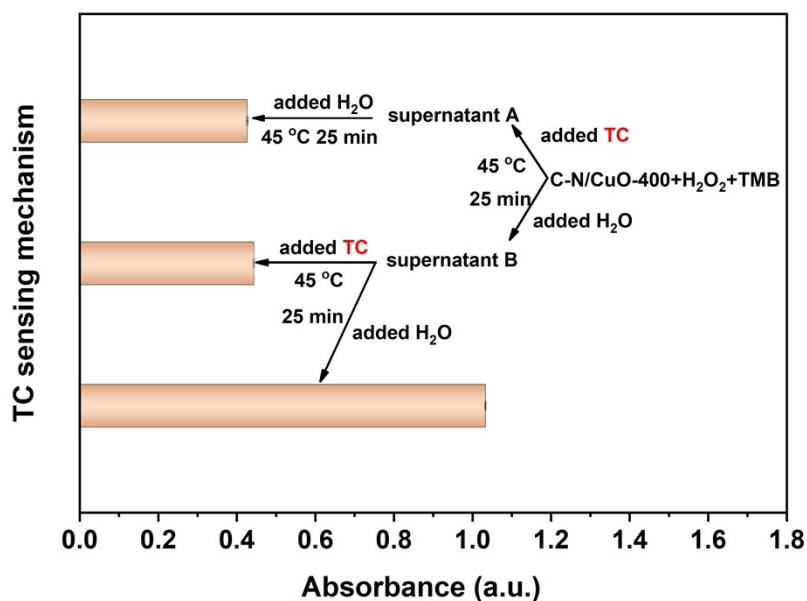

**Figure S10.** The investigation of TC sensing mechanism by using C-N/CuO-400 as the sensing platform. After the mixtures of C-N/CuO-400, TMB, and  $\text{H}_2\text{O}_2$  with and without TC, were incubated at  $45\text{ }^\circ\text{C}$  for 25 min, the resulting solutions were followed by centrifugation, achieving the supernatant A and B. Inset illustrates schematic diagrams of different reaction processes.  $[\text{TC}] = 40\text{ }\mu\text{M}$ ,  $[\text{C-N/CuO-400}] = 0.16\text{ mg/mL}$ .

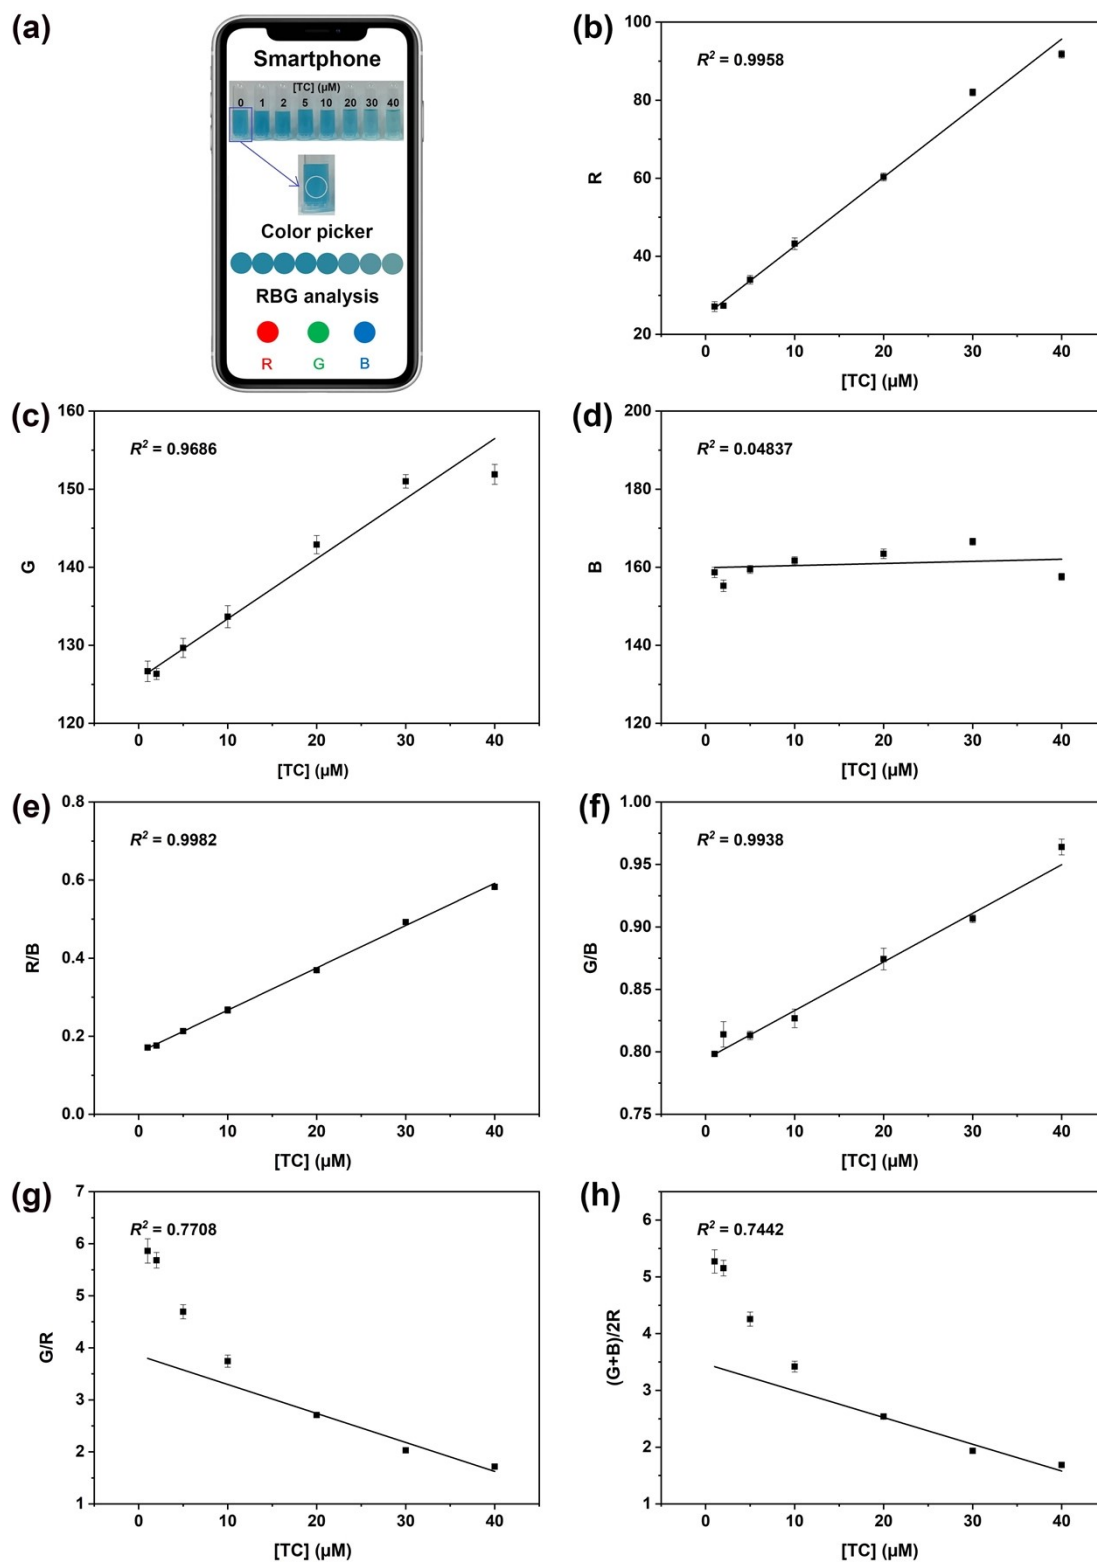

**Figure S11.** (a) RGB reading diagram of a smart phone. (b-h) Linear relationship between RGB values (or their ratios) and TC concentration in the range of 1-40  $\mu\text{M}$ . TC concentration was 1, 2, 5, 10, 20, 30 and 40  $\mu\text{M}$ , respectively.

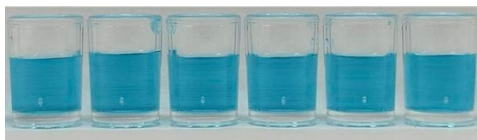

**Figure S12.** The photographs of the TMB-H<sub>2</sub>O<sub>2</sub> system catalyzed by C-N/CuO-400 captured using an iPhone 16 Pro Max (n = 6).

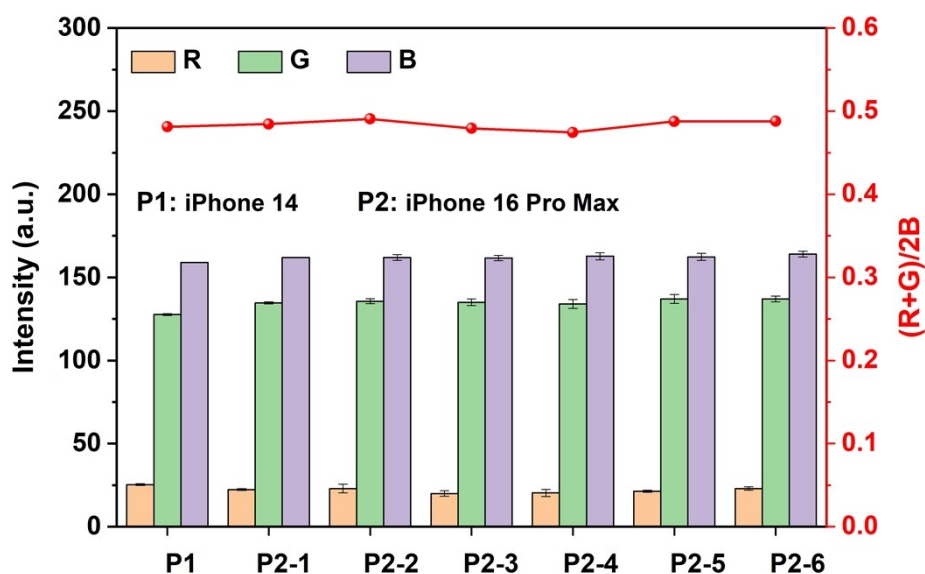

**Figure S13.** RGB values obtained from photographs of the TMB-H<sub>2</sub>O<sub>2</sub> system catalyzed by C-N/CuO-400 captured using iPhone 14 (P1) and iPhone 16 Pro Max (n = 6, P2-1 to P2-6), along with the corresponding calculated (R+G)/2B ratios.

## Reference

- [1] Gao, L.; Zhuang, J.; Nie, L.; Zhang, J.; Zhang, Y.; Gu, N.; Wang, T.; Feng, J.; Yang, D.; Perrett, S.; et al. Intrinsic peroxidase-like activity of ferromagnetic nanoparticles. *Nat. Nanotechnol.* 2007, 2, 577-583.
- [2] Lian, Q.; Liu, H.; Zheng, X.; Li, X.; Zhang, F.; Gao, J. Enhanced peroxidase-like activity of CuO/Pt nanoflowers for colorimetric and ultrasensitive Hg<sup>2+</sup> detection in water sample. *Appl. Surf. Sci.* 2019, 483, 551-561.
- [3] Zhao, H.; Li, K.; Zou, Y.; Wang, Y.; Zhong, Z.; Xi, Y.; Xiao, X. Enhanced peroxidase-like activity of Cu-Cu<sub>2</sub>O composite film through PtPd immobilization for colorimetric glucose detection. *Talanta* 2024, 273, 125964.

- [4] Zheng, X.; Lian, Q.; Zhou, L.; Jiang, Y.; Gao, J. Peroxidase mimicking of binary polyacrylonitrile-CuO nanoflowers and the application in colorimetric detection of H<sub>2</sub>O<sub>2</sub> and ascorbic acid. *ACS Sustainable Chem. Eng.* 2021, 9, 7030-7043.
- [5] Zhang, X.; Xue, C.; Cao, H.; Wu, Y.; Yang, B.; Zhou, T.; Zhai, W.; Deng, J. Ultra-small CuOx/GDYO nanozyme with boosting peroxidase-like activity via electrochemical strategy: Toward applicable colorimetric detection of organophosphate pesticides. *Talanta* 2024, 279, 126639.
- [6] Sun, G.; Zhang, Y.; Qian, D.; Xu, Q.; Li, J.; Li, H. Morphology-controlled peroxidase-like cuprous oxide-platinum cubes for dual-mode sensing of mercury ions. *Sens. Actuators B: Chem* 2024, 410, 135709.
- [7] Song, Y.; Qiao, J.; Liu, W.; Qi, L. Enhancement of gold nanoclusters-based peroxidase nanozymes for detection of tetracycline. *Microchem. J.* 2020, 157, 104871.
- [8] Chang, Y.; He, R.; Wei, Y.; Wang, L. Polyethyleneimine-sulfur quantum dot composites for dual-channel detection of tetracycline by colorimetric and fluorescence sensing. *ACS Appl. Nano Mater* 2023, 6, 7414-7421.
- [9] Venugopalan, P.; Vidya, N. Microwave-assisted green synthesis of carbon dots derived from wild lemon (*Citrus pennivesiculata*) leaves as a fluorescent probe for tetracycline sensing in water. *Spectrochim. Acta Part A: Mol. Biomol. Spectrosc.* 2023, 286, 122024.
- [10] Wang, C.; Sun, Q.; Yang, M.; Liu, E.; Xue, W.; Fan, J. Preparation of highly luminescent nitrogen-doped carbon quantum dots and their detection of tetracycline antibiotics. *Colloids Surf. A: Physicochem. Eng. Asp.* 2022, 653, 129982.
- [11] Wei, X.; Lv, L.; Zhang, Z.; Guan, W. Preparation of molecularly imprinted fluorescence sensor based on carbon quantum dots via precipitation polymerization for fluorescence detection of tetracycline. *J. Appl. Polym. Sci.* 2020, 137, e49126.
